# Supplementary material for: Decreased expression of endogenous feline leukemia virus in cat lymphomas: a case control study
Source: PubMed Central journal article supplement (PMC4424575; doi:10.1186/s12917-015-0378-9), 2015-04-10
Supplement: 12917_2015_378_MOESM1_ESM.pdf [file 12917_2015_378_MOESM1_ESM.pdf]

Additional Table 1

Number of sequenced reads per cat sample

| Condition | Cat | Total no. of reads (x 10 <sup>6</sup> ) |
|-----------|-----|-----------------------------------------|
| control   | A   | 75                                      |
|           | B   | 71                                      |
|           | C   | 68                                      |
| tumor     | D   | 79                                      |
|           | E   | 73                                      |
|           | F   | 70                                      |
|           | G   | 72                                      |
|           | H   | 72                                      |
